# Supplementary material for: Capnocytophaga canimorsus Capsular Serovar and Disease Severity, Helsinki Hospital District, Finland, 2000–2017
Source: PubMed Central journal article supplement (PMC6256374; doi:10.3201/eid2412.172060), 2018-12
Supplement: 17-2060-Techapp-s1.pdf [file 17-2060-Techapp-s1.pdf]

# *Capnocytophaga canimorsus* Capsular Serovar and Disease Severity, Helsinki Hospital District, Finland, 2000–2017

## Technical Appendix

**Technical Appendix Table 1.** Description of method and sample used for 16S rDNA identification of 73 *Capnocytophaga canimorsus* isolates from study, Helsinki, Finland, 2000–2017

| Isolate ID | Method used     | Sample used                        |
|------------|-----------------|------------------------------------|
| H1         | UNamur          | Isolated colony                    |
| H3         | UNamur          | Isolated colony                    |
| H4         | UNamur          | Isolated colony                    |
| H5         | HUSLAB method 3 | Directly from blood culture bottle |
| H6         | HUSLAB method 3 | Directly from blood culture bottle |
| H7         | HUSLAB method 3 | Directly from blood culture bottle |
| H8         | HUSLAB method 3 | Directly from blood culture bottle |
| H9         | HUSLAB method 3 | Isolated colony                    |
| H10        | HUSLAB method 3 | Isolated colony                    |
| H11        | HUSLAB method 3 | Directly from blood culture bottle |
| H12        | UNamur          | Isolated colony                    |
| H13        | HUSLAB method 3 | Directly from blood culture bottle |
| H14        | HUSLAB method 3 | Directly from blood culture bottle |
| H15        | HUSLAB method 3 | Directly from blood culture bottle |
| H16        | HUSLAB method 3 | Directly from blood culture bottle |
| H17        | HUSLAB method 3 | Directly from blood culture bottle |
| H18        | HUSLAB method 3 | Directly from blood culture bottle |
| H19        | HUSLAB method 3 | Isolated colony                    |
| H20        | HUSLAB method 3 | Directly from blood culture bottle |
| H21        | UNamur          | Isolated colony                    |
| H22        | HUSLAB method 3 | Isolated colony                    |
| H23        | HUSLAB method 3 | Isolated colony                    |
| H24        | UNamur          | Isolated colony                    |
| H25        | HUSLAB method 3 | Directly from blood culture bottle |
| H26        | HUSLAB method 3 | Isolated colony                    |
| H27        | HUSLAB method 3 | Isolated colony                    |
| H28        | HUSLAB method 3 | Isolated colony                    |
| H29        | HUSLAB method 3 | Isolated colony                    |
| H30        | HUSLAB method 3 | Isolated colony                    |
| H31        | HUSLAB method 3 | Directly from blood culture bottle |
| H33        | HUSLAB method 3 | Isolated colony                    |
| H34        | HUSLAB method 3 | Isolated colony                    |
| H35        | HUSLAB method 3 | Directly from blood culture bottle |
| H36        | HUSLAB method 3 | Directly from blood culture bottle |
| H37        | HUSLAB method 3 | Directly from blood culture bottle |
| H38        | HUSLAB method 3 | Directly from blood culture bottle |
| H39        | HUSLAB method 3 | Isolated colony                    |
| H41        | HUSLAB method 3 | Directly from blood culture bottle |
| H42        | HUSLAB method 3 | Directly from blood culture bottle |
| H43        | HUSLAB method 3 | Directly from blood culture bottle |
| H44        | HUSLAB method 2 | Isolated colony                    |
| H45        | HUSLAB method 2 | Isolated colony                    |
| H46        | HUSLAB method 2 | Isolated colony                    |
| H47        | HUSLAB method 2 | Directly from blood culture bottle |
| H48        | HUSLAB method 2 | Directly from blood culture bottle |
| H49        | HUSLAB method 1 | Isolated colony                    |
| H50        | HUSLAB method 1 | Isolated colony                    |
| H51        | HUSLAB method 1 | Directly from blood culture bottle |
| H52        | HUSLAB method 1 | Directly from blood culture bottle |
| H53        | HUSLAB method 1 | Directly from blood culture bottle |

| Isolate ID | Method used     | Sample used                        |
|------------|-----------------|------------------------------------|
| H55        | HUSLAB method 1 | Isolated colony                    |
| H56        | HUSLAB method 1 | Directly from blood culture bottle |
| H57        | HUSLAB method 1 | Directly from blood culture bottle |
| H58        | HUSLAB method 1 | Directly from blood culture bottle |
| H59        | HUSLAB method 1 | Directly from blood culture bottle |
| H60        | HUSLAB method 1 | Isolated colony                    |
| H62        | HUSLAB method 1 | Directly from blood culture bottle |
| H63        | HUSLAB method 1 | Isolated colony                    |
| H64        | HUSLAB method 1 | Isolated colony                    |
| H65        | HUSLAB method 1 | Directly from blood culture bottle |
| H67        | HUSLAB method 1 | Directly from blood culture bottle |
| H68        | HUSLAB method 1 | Isolated colony                    |
| H69        | HUSLAB method 1 | Directly from blood culture bottle |
| H70        | UNamur          | Isolated colony                    |
| H71        | UNamur          | Isolated colony                    |
| H72        | UNamur          | Isolated colony                    |
| H73        | UNamur          | Isolated colony                    |
| H74        | HUSLAB method 1 | Directly from blood culture bottle |
| H75        | HUSLAB method 1 | Isolated colony                    |
| H76        | UNamur          | Isolated colony                    |
| H78        | HUSLAB method 1 | Directly from blood culture bottle |
| H79        | HUSLAB method 1 | Isolated colony                    |
| H80        | HUSLAB method 1 | Isolated colony                    |

**Technical Appendix Table 2.** Oligonucleotides used for typing *Capnocytophaga canimorsus* isolates, Helsinki, Finland, 2000–2017

| Name             | Sequence 5'-3'                            | Reference |
|------------------|-------------------------------------------|-----------|
| 533R             | TTACCGCGGCTGCTGGCAC                       | (11)      |
| FD1 mod          | AGAGTTTGATCYTGGYTYAG                      | (11)      |
| CLSI-F           | TTGGAGAGTTTGATCMTGGCTC                    | (12)      |
| Forward Bosshard | AGAGTTTGATCMTGGCTCAG                      | (12)      |
| Reverse Bosshard | GTATTACCGCGGCTGCTG                        | (12)      |
| 27F              | AGAGTTTGATCCTGGCTCAG                      | (13, 14)  |
| 1100R            | GGGTTGCGCTCGTTG                           | (13, 14)  |
| 685R             | TCTACGCATTTACCGCTAC                       | (13, 14)  |
| SeroA-fw         | CATACCATGGGAAAAAAGTACCAATAGTTTTATATTTAACC | (10)      |
| SeroA-rev        | CCGCTCGAGTCATTTTTTATCTTTTTAAATATATTCCAC   | (10)      |
| SeroB-fw         | CATACCATGGGAATTAACAAAATTCTAATAG           | (10)      |
| SeroB-rev        | CCGCTCGAGTTATTTTTATTTTCATTAG              | (10)      |
| SeroC-fw         | GGCGTATATCGTTGCTATTTTGTATG                | (10)      |
| SeroC-rev        | CTATTAATATTTTCATTGTACACCACTTC             | (10)      |
| SeroD-fw         | GATTTAAAAAATATAGTATTTTAGGAATTATCG         | (10)      |
| SeroD-rev        | CTATACTTGTCCCCTTTTTAGTTTC                 | (10)      |
| SeroE-fw         | GGAGGAGGAAAAGTATTATTAGATTATC              | (10)      |
| SeroE-rev        | CTATTCATAATTCTTAAAGATACTTATCAATTC         | (10)      |
| SeroABC-fw       | CTTGTTAGGTAAGTTGCCTTAC                    | (10)      |
| SeroABC-rev      | CAACATTTCTCCCCTCTTATAATCCC                | (10)      |

**Technical Appendix Table 3.** Description of 16S rDNA sequencing methods used for *Capnocytophaga canimorsus* isolates, Helsinki, Finland, 2000–2017

| Category              | Method name                                                                   |                                                                               |                                                                              |                                                                                                                                                                                                                            |
|-----------------------|-------------------------------------------------------------------------------|-------------------------------------------------------------------------------|------------------------------------------------------------------------------|----------------------------------------------------------------------------------------------------------------------------------------------------------------------------------------------------------------------------|
|                       | HUSLAB method 1                                                               | HUSLAB method 2                                                               | HUSLAB method 3                                                              | UNamur                                                                                                                                                                                                                     |
| Forward primer        | 533R                                                                          | CLSI F                                                                        | CLSI F                                                                       | 27F                                                                                                                                                                                                                        |
| Reverse primer        | FD1mod                                                                        | Reverse Bosshard                                                              | Reverse Bosshard                                                             | 1100R                                                                                                                                                                                                                      |
| DNA polymerase        | AmpliTaq Gold<br>(Applied Biosystems,<br>Waltham, MA, USA)                    | AmpliTaq Gold<br>(Applied Biosystems,<br>Waltham, MA, USA)                    | MolTaq 16S<br>(Molzym, Bremen,<br>Germany)                                   | Takara PrimeSTAR (Clontech,<br>Kasatsu, Japan)                                                                                                                                                                             |
| Amplification program | 94°C for 10 min. 35 cycles of 94°C for 15 s, 55°C for 15 s, and 72°C for 30 s | 95°C for 10 min. 30 cycles of 94°C for 15 s, 64°C for 15 s, and 72°C for 30 s | 95°C for 2 min. 40 cycles of 94°C for 15 s, 64°C for 15 s, and 72°C for 30 s | 5 cycles of 94°C for 30 s, 60°C for 2 min, and 72°C for 3 min with a reduction of annealing temperature of 1.5°C/cycle. 30 cycles of 94°C for 30s, 52°C for 90 s, and 72°C for 3 min. Final elongation at 72°C for 10 min. |
| Sequencing primer(s)  | 533R                                                                          | Forward Bosshard                                                              | Forward Bosshard                                                             | 27F, 685R, and 1100R                                                                                                                                                                                                       |

**Technical Appendix Table 4.** *Capnocytophaga canimorsus* strains used in study, Helsinki, Finland, 2000–2017\*

| Isolate ID | Collection                                               | History and geographic origin                                                                                         | Reference |
|------------|----------------------------------------------------------|-----------------------------------------------------------------------------------------------------------------------|-----------|
| Cc1        | BCCM/LMG 11511; CCUG 17234; strain P810; strain SSI P810 | BCCM/LMG <CCUG Sweden <W.Frederiksen <J.Ursing. Malmö. Sweden                                                         | (1)       |
| Cc2        | CCUG 70775                                               | G. Wauters and M. Delmee. Cliniques Universitaires St Luc. Brussels. Belgium                                          | (2)       |
| Cc3        | –                                                        | G. Wauters and M. Delmee <Sint-Jan Hospital. Brugges. Belgium                                                         | (3)       |
| Cc4        | CCUG 70776                                               | J. Schrenzel. Hopitaux Universitaires de Genève. Switzerland                                                          | (4)       |
| Cc5        | BCCM/LMG 28512. CCUG 70777                               | G. Wauters and M. Delmee <Clinic of Libramont. Libramont. Belgium                                                     | (5)       |
| Cc6        | CCUG 70778                                               | KU Leuven. Leuven. Belgium                                                                                            | (6)       |
| Cc7        | –                                                        | G. Wauters and M. Delmee. <KU Leuven. Leuven. Belgium                                                                 | (5)       |
| Cc8        | –                                                        | M. Delmee <Liège. Belgium                                                                                             | (6)       |
| Cc9        | BCCM/LMG 11510. CCUG 12569. CDC A3626                    | BCCM/LMG. CCUG <R. Weaver. CDC. Atlanta. Georgia <Virginia. USA                                                       | (7)       |
| Cc10       | BCCM/LMG 11541. CCUG 24741. ATCC 35978. CDC C8936        | BCCM/LMG. MCCM. ATCC <R. Weaver. CDC. Atlanta. Georgia <California Health Department. California. USA                 | (7)       |
| Cc11       | BCCM/LMG 11551. CCUG 70779. MCCM 01373                   | BCCM/LMG <MCCM <A. von Graevenitz. Unersität Zurich. Switzerland                                                      | (7)       |
| Cc12       | ATCC 35979. CDC 7120. CCUG 53895                         | ATCC <R.Weaver. CDC Atlanta Georgia <California Health Dept. <San Antonio Community Hospital. California. USA         | (8)       |
| Cc13       | –                                                        | F.S. Stals. Laurentius Ziekenhuis. Roermond. The Netherlands                                                          | (9)       |
| Cc14       | –                                                        | R. Jarsumbeck. Medizinisches labor Ostsachsen. Dresden. Germany                                                       | (6)       |
| Cc15       | –                                                        | K. Mühlemann. University Hospital Bern. Switzerland                                                                   | (6)       |
| Cc16       | –                                                        | G. Glupczynski. Centre Hospitalier Universitaire Mont Godinne <D. Olivier. Hopital Univ. Erasme. Brussels. Belgium    | (6)       |
| Cc17       | –                                                        | G. Glupczynski. Centre Hospitalier Universitaire Mont Godinne <D. Olivier. Hopital Univ. Erasme. Brussels. Belgium    | (6)       |
| Cc18       | –                                                        | G. Glupczynski. Centre Hospitalier Universitaire Mont Godinne <D. Olivier. Hopital Univ. Erasme. Brussels. Belgium    | (6)       |
| Cc19       | –                                                        | A. Magnette. Centre Hospitalier Universitaire Mont-Godinne <M Delmée <Clinique Saint Pierre. Ottignies. Belgium       | (6)       |
| Cc20       | CCUG 55909                                               | CCUG <E. Ek. Blood Department. PHLS. Göteborg. Sweden <UK National External Quality assessment. Colindale. London. UK | (10)      |
| Cc21       | CCUG 60839                                               | CCUG <E. Ek. Blood Department. PHLS. Göteborg. Sweden                                                                 | (10)      |
| Cc22       | CCUG 20318                                               | CCUG <W. Frederiksen. Statens Seruminstitut. Copenhagen. Denmark                                                      | (10)      |
| Cc23       | CCUG 48899                                               | CCUG <V. Roux and D. Raoult. Marseille. France                                                                        | (10)      |
| Cc24       | CCUG 67384                                               | CCUG <PHLS. Uddevalla <Trollhätten. Sweden                                                                            | (10)      |
| Cc25       | CCUG 66222                                               | CCUG <I. Adlerberth. Blood Department. PHLS. Sahlgrenska University Hospital. Göteborg. Sweden                        | (10)      |
| CcD3-      | –                                                        | Switzerland                                                                                                           | (6)       |
| CcD106†    | –                                                        | Belgium                                                                                                               | (6)       |
| CcD113-    | –                                                        | Belgium                                                                                                               | (6)       |
| CcD131†    | –                                                        | Belgium                                                                                                               | (6)       |

\*All human isolates listed were from human septicemia cases except Cc4, which was isolated from a prosthetic aortitis case. ATCC, American Type Culture Collection; BCCM/LMG, Belgian Co-ordinated Collections of Micro-organisms, Laboratory of Microbiology, UGent; CCUG, Culture Collection University of Gothenburg; CDC, Centers for Disease Control and Prevention; MCCM, Medical Culture Collection Marburg; PHLS, Public Health Laboratory Services.

†Dog mouth isolates.

**Technical Appendix Table 5.** Capsular serotyping of *Capnocytophaga canimorsus* dog isolates by ELISA\*

| Isolate | Serovar J |     | Serovar K |      |
|---------|-----------|-----|-----------|------|
|         | Mean      | SD  | Mean      | SD   |
| H12     | 100       | 0   | 6.2       | 0.6  |
| H24     | 10        | 2.2 | 100       | 0    |
| Cc5     | 9.4       | 2.1 | 6.1       | 0.4  |
| Cc6     | 9.6       | 2.3 | 6.4       | 0.5  |
| Cc9     | 10        | 2.6 | 6.4       | 0.6  |
| Cc12    | 9.7       | 2.3 | 7.5       | 1.0  |
| Cc4     | 10        | 2.9 | 7.4       | 1.4  |
| CcD3    | 6.9       | 0.7 | 5.5       | 0.4  |
| CcD5    | 7.2       | 1.3 | 5.9       | 0.3  |
| CcD6    | 7.6       | 1.8 | 6.4       | 0.8  |
| CcD10   | 7.1       | 1.2 | 7.2       | 0.4  |
| CcD13   | 6.4       | 1.2 | 5.7       | 0.5  |
| CcD16   | 6.9       | 1.5 | 6.2       | 0.4  |
| CcD18   | 8.4       | 2.1 | 6.9       | 0.7  |
| CcD20   | 9.6       | 2.3 | 6.9       | 0.8  |
| CcD25   | 6.6       | 1.1 | 6.0       | 0.4  |
| CcD33   | 7.2       | 1.7 | 7.1       | 1.4  |
| CcD34   | 8.7       | 2.0 | 6.4       | 1.9  |
| CcD35   | 43.5      | 4.0 | 5.8       | 0.3  |
| CcD37   | 6.2       | 1.3 | 5.6       | 0.2  |
| CcD39   | 6.7       | 1.5 | 5.7       | 0.3  |
| CcD40   | 7.4       | 1.8 | 7.0       | 1.3  |
| CcD43   | 7.4       | 1.3 | 5.9       | 0.3  |
| CcD44   | 6.3       | 1.2 | 5.4       | 0.2  |
| CcD47   | 7.0       | 1.9 | 5.8       | 0.3  |
| CcD51   | 7.6       | 2.0 | 6.4       | 1.0  |
| CcD52   | 8.3       | 1.5 | 7.0       | 1.9  |
| CcD53   | 7.6       | 1.9 | 6.3       | 0.4  |
| CcD57   | 7.3       | 1.9 | 7.2       | 3.0  |
| CcD58   | 9.9       | 4.1 | 6.8       | 0.8  |
| CcD63   | 7.2       | 1.1 | 5.8       | 0.2  |
| CcD68   | 8.0       | 2.8 | 5.8       | 0.4  |
| CcD69   | 8.6       | 3.1 | 5.6       | 0.4  |
| CcD71   | 8.8       | 2.0 | 5.7       | 0.4  |
| CcD73   | 7.1       | 1.4 | 6.9       | 1.3  |
| CcD76   | 6.8       | 1.3 | 5.4       | 0.2  |
| CcD77   | 7.6       | 1.6 | 6.7       | 0.5  |
| CcD80   | 7.3       | 1.4 | 6.2       | 0.6  |
| CcD81   | 7.6       | 0.6 | 8.2       | 2.3  |
| CcD84   | 7.6       | 1.0 | 7.1       | 0.5  |
| CcD89   | 8.5       | 1.3 | 8.0       | 0.7  |
| CcD96   | 7.6       | 1.0 | 12.4      | 8.3  |
| CcD101  | 9.3       | 1.8 | 12.2      | 8.7  |
| CcD104  | 7.6       | 0.8 | 10.8      | 7.3  |
| CcD105  | 8.7       | 1.5 | 8.4       | 2.9  |
| CcD106  | 9.5       | 1.8 | 11.2      | 2.9  |
| CcD113  | 7.5       | 1.1 | 11.2      | 7.5  |
| CcD115  | 7.5       | 1.5 | 11.8      | 8.2  |
| CcD116  | 8.0       | 1.6 | 10.1      | 5.8  |
| CcD117  | 8.1       | 1.8 | 12.8      | 8.6  |
| CcD118  | 7.2       | 1.1 | 11.6      | 7.3  |
| CcD119  | 7.6       | 1.5 | 11.5      | 7.4  |
| CcD120  | 7.4       | 1.6 | 12.4      | 9.6  |
| CcD122  | 8.8       | 1.6 | 11.5      | 8.8  |
| CcD124  | 7.2       | 1.2 | 12.2      | 9.4  |
| CcD126  | 7.3       | 1.3 | 11.3      | 8.2  |
| CcD129  | 8.1       | 1.6 | 9.4       | 3.8  |
| CcD130  | 8.4       | 1.6 | 14.7      | 10.2 |
| CcD131  | 7.1       | 1.8 | 12.2      | 9.2  |

\*Capsular serotyping was determined by ELISA on entire heat-killed bacteria. The following sera were used: anti-H12 adsorbed with human isolates Cc1 to Cc25 (J antiserum) and anti-H24 adsorbed with human isolates Cc1 to Cc25 (K antiserum). Isolates Cc5, Cc6, Cc9, Cc12, and Cc4, which were serovars A–E, respectively, were used as negative controls. The readout of the ELISA was absorbance but results are expressed here as percentage of reactivity calculated with respect to the absorbance value obtained for the capsular type strain. Values are the mean and SD of at least 3 independent experiments.

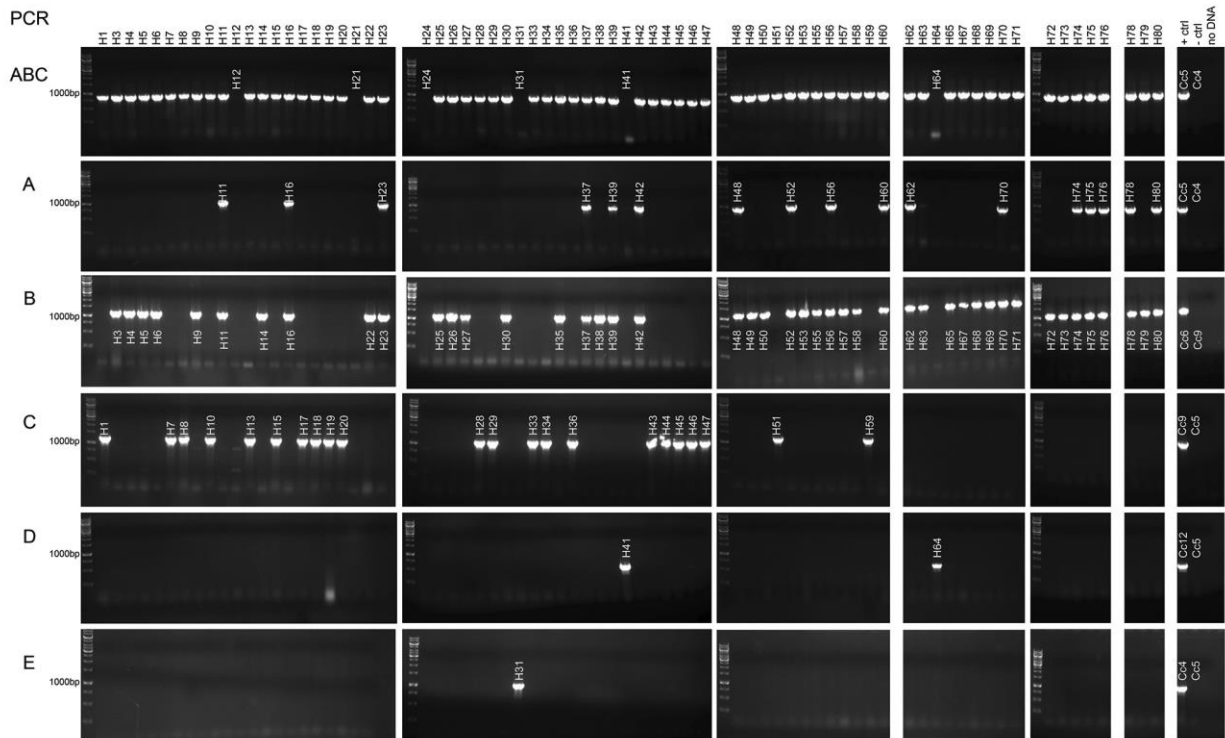

**Technical Appendix Figure 1.** Capsular typing of *Capnocytophaga canimorsus* isolates from patients, Helsinki, Finland, 2000–2017, by PCR. PCR detection of capsular serovars A–E with oligonucleotides given in Technical Appendix Table 2. The capsular type of each serovar described in reference (10) were used as positive controls: Cc5, Cc6 (6), Cc9 (7), Cc12 (American Type Culture Collection 35979) (8), and Cc4 (4) for A, B, C, D, and E serovars, respectively. For PCR ABC, Cc5 was used as a positive control. A strain of another capsular type and no DNA were used as negative controls. Three strains were identified by 16S rDNA sequencing to be a member of other dog-hosted *Capnocytophaga* species and were removed from our study and from this figure by cutting out the according lanes. Ctrl, control.

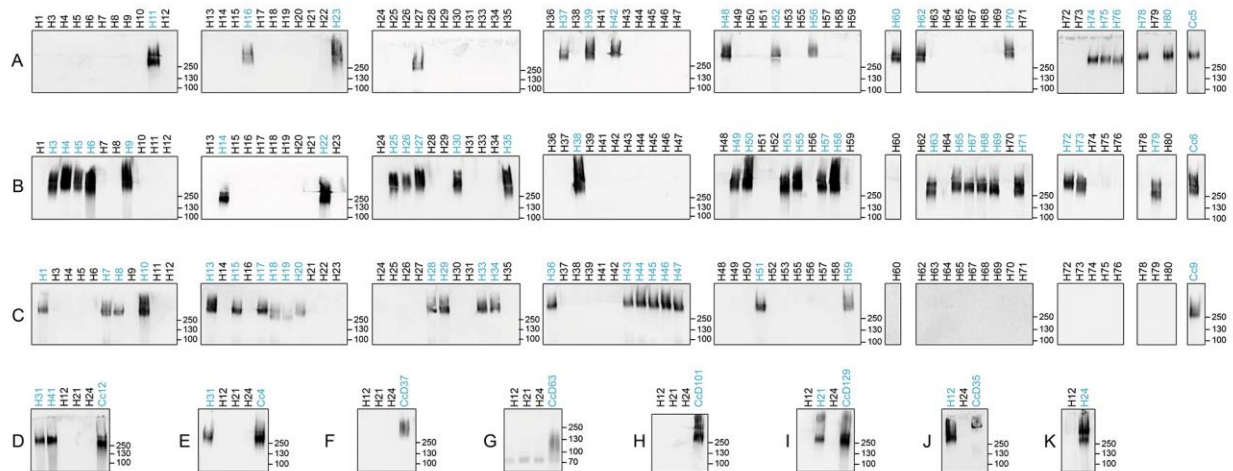

**Technical Appendix Figure 2.** Capsular serotyping of *Capnocytophaga canimorsus* isolates from patients, Helsinki, Finland, 2000–2017, by Western blot. Western blot analysis of proteinase-K treated lysates of *C. canimorsus* isolates by using A–K antisera. Cc5, Cc6, Cc9, Cc12, Cc4, CcD37 (6), CcD63 (6), CcD101 (6), and CcD129 (6) were used as positive controls for capsular serovars A–I, respectively. Numbers correspond to molecular mass (kDa). Three strains were identified by 16S rDNA sequencing to be members of other dog-hosted *Capnocytophaga* species and were removed from our study and from this figure by cutting out the according lanes.

## References

1. Heltberg O, Busk HE, Bremmelgaard A, Kristiansen JE, Frederiksen W. The cultivation and rapid enzyme identification of DF-2. *Eur J Clin Microbiol.* 1984;3:241–3. [PubMed](http://dx.doi.org/10.1007/BF02014893) <http://dx.doi.org/10.1007/BF02014893>
2. Hantson P, Gautier PE, Vekemans MC, Fievez P, Evrard P, Wauters G, et al. Fatal *Capnocytophaga canimorsus* septicemia in a previously healthy woman. *Ann Emerg Med.* 1991;20:93–4. [PubMed](http://dx.doi.org/10.1016/S0196-0644(05)81130-8) [http://dx.doi.org/10.1016/S0196-0644\(05\)81130-8](http://dx.doi.org/10.1016/S0196-0644(05)81130-8)
3. Vanhonsbrouck AY, Gordts B, Wauters G, Van Landuyt HW. Fatal septicemia with *Capnocytophaga canimorsus* in a compromised host. A case report with review of the literature. *Acta Clin Belg.* 1991;46:364–70. [PubMed](http://dx.doi.org/10.1080/17843286.1991.11718192) <http://dx.doi.org/10.1080/17843286.1991.11718192>
4. Rougemont M, Ratib O, Wintsh J, Schrenzel J, Hirschel B. *Capnocytophaga canimorsus* prosthetic aortitis in an HIV-positive woman. *J Clin Microbiol.* 2013;51:2769–71. [PubMed](http://dx.doi.org/10.1128/JCM.00321-13) <http://dx.doi.org/10.1128/JCM.00321-13>

5. Shin H, Mally M, Kuhn M, Paroz C, Cornelis GR. Escape from immune surveillance by *Capnocytophaga canimorsus*. J Infect Dis. 2007;195:375–86. [PubMed](#)  
<http://dx.doi.org/10.1086/510243>
6. Renzi F, Dol M, Raymackers A, Manfredi P, Cornelis GR. Only a subset of *C. canimorsus* strains is dangerous for humans. Emerg Microbes Infect. 2016;5:e29. [PubMed](#)  
<http://dx.doi.org/10.1038/emi.2016.43>
7. Vandamme P, Vancanneyt M, van Belkum A, Segers P, Quint WG, Kersters K, et al. Polyphasic analysis of strains of the genus *Capnocytophaga* and Centers for Disease Control group DF-3. Int J Syst Bacteriol. 1996;46:782–91. [PubMed](#) <http://dx.doi.org/10.1099/00207713-46-3-782>
8. Butler T, Weaver RE, Ramani TK, Uyeda CT, Bobo RA, Ryu JS, et al. Unidentified gram-negative rod infection. A new disease of man. Ann Intern Med. 1977;86:1–5. [PubMed](#)  
<http://dx.doi.org/10.7326/0003-4819-86-1-1>
9. Kleijnen-Grebien B, Boorsma S, Stals FS, van Schelven R. Fatal case of sepsis with *Capnocytophaga canimorsus* after a minor dog bite [in Dutch]. Ned Tijdschr Geneesk. 2008;152:1882–5. [PubMed](#)
10. Hess E, Renzi F, Koudad D, Dol M, Cornelis GR. Identification of virulent *Capnocytophaga canimorsus* isolates by capsular typing. J Clin Microbiol. 2017;55:1902–14. [PubMed](#)  
<http://dx.doi.org/10.1128/JCM.00249-17>
11. Kotilainen P, Jalava J, Meurman O, Lehtonen OP, Rintala E, Seppälä OP, et al. Diagnosis of meningococcal meningitis by broad-range bacterial PCR with cerebrospinal fluid. J Clin Microbiol. 1998;36:2205–9. [PubMed](#)
12. Edwards KJ, Logan JM, Langham S, Swift C, Gharbia SE. Utility of real-time amplification of selected 16S rRNA gene sequences as a tool for detection and identification of microbial signatures directly from clinical samples. J Med Microbiol. 2012;61:645–52. [PubMed](#)  
<http://dx.doi.org/10.1099/jmm.0.041764-0>
13. Johnson JL. Similarity analysis of rRNAs. In: Gerhard P, Murray RGE, Wood NR, Krieg NR, editors. Methods for general and molecular bacteriology. Washington, DC (USA): American Society for Microbiology; 1994. p. 683–700.
14. Lane DJ. 16S/23S rRNA sequencing. In: Stackebrandt EG, Goodfellow M, editors. Nucleic acid techniques in bacterial systematics. New York (USA): John Wiley & Sons; 1991. p. 115–74.
